# Supplementary material for: L-765,314 Suppresses Melanin Synthesis by Regulating Tyrosinase Activity
Source: PubMed Central journal article supplement (PMC6412649; doi:10.3390/molecules24040773), 2019-02-21
Supplement: molecules-24-00773-s001.pdf [file molecules-24-00773-s001.pdf]

Supplementary Materials:

Table S1. Primer list for qRT-PCR.

| Gene       | Forward primer             | Reverse primer             |
|------------|----------------------------|----------------------------|
| L32        | 5'-AGATCCTGATGCCCAACATC-3' | 5'-CAGTCCTTGACATTGTGGA-3'  |
| mADRA1a    | 5'-GCTCCGTATCCACCGTAAAA-3' | 5'-TCTCTCGGGAAAACCTGAGC-3' |
| mADRA1b    | 5'-GAGGCTGCGCTTACACCTAC-3' | 5'-CTGCCACTGTCATCCAGAGA-3' |
| mADRA1d    | 5'-TCCGTAAGGCTGCTCAAGTT-3' | 5'-GGACGAAGAAAAAGGGGAAC-3' |
| hADRA1a    | 5'-ACATTTCCAAGGCCATTCTG-3' | 5'-CAGGCTACGGAGAGGATCAC-3' |
| hADRA1b    | 5'-TCTCCAGGGAAAAGAAAGCA-3' | 5'-GCGGTAGAGCGATGAAGAAG-3' |
| hADRA1d    | 5'-CTCAGAGGTGGAGGCTGTGT-3' | 5'-TATCGGTCTCCCGTAGGTTG-3' |
| MITF       | 5'-TGAAGCAAGAGCATTGGCTA-3' | 5'-TCCACAGAGGCCTTGAGAAT-3' |
| Tyrosinase | 5'-TTATGCGATGGAACACCTGA-3' | 5'-ACTGGCAAATCCTTCCAGTG-3' |

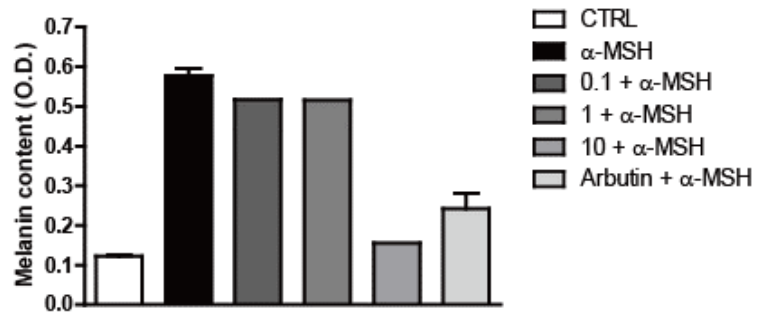

**Figure S1.** Melanin content assay-based HTS screening in B16F10 cells. Following 500 nM  $\alpha$ -MSH treatment, 0.1, 1, or 10  $\mu$ M L765,314 was applied and melanin content was measured.

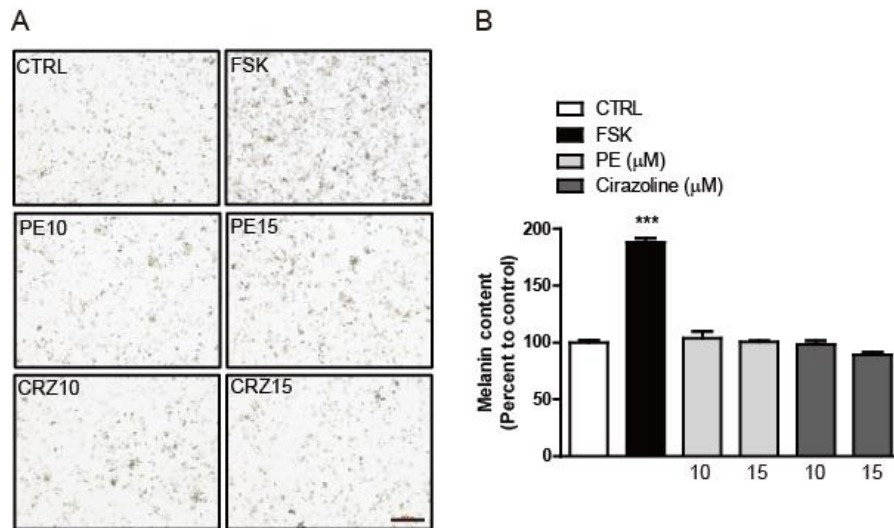

**Figure S2.** Mel-ab cells were treated with vehicle (DMSO), 5  $\mu$ M forskolin (FSK), or 15  $\mu$ M phenylephrine (PE15) and 15  $\mu$ M cirazoline (CZ15). Ninety-six hours after treatment, (A) microscopic images were captured and (B) melanin contents were measured. Melanin contents are given as percent changes relative to vehicle-treated controls. Scale bar: 1000  $\mu$ m.

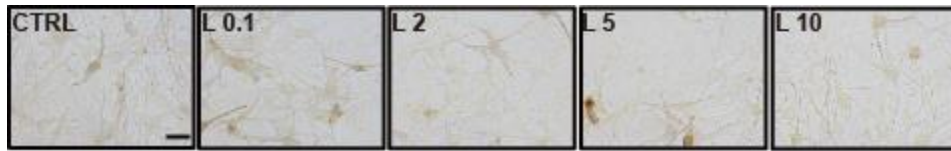

**Figure S3.** Microscopic images of normal human melanocytes treated with 0.1–10  $\mu\text{M}$  L-765,314 for 96 h. Scale bar: 200  $\mu\text{m}$ .
